1           **Chromosomal Resistance to Metronidazole in *Clostridioides difficile* can be**  
2           **Mediated By Epistasis Between Iron Homeostasis and Oxidoreductases**

3  
4 Aditi Deshpande<sup>1#</sup>, Xiaoqian Wu<sup>1#</sup>, Wenwen Huo<sup>2,3</sup>, Kelli L. Palmer<sup>2</sup>, Julian G. Hurdle<sup>1\*</sup>

5 <sup>1</sup>Center for Infectious and Inflammatory Diseases, Institute of Biosciences and  
6 Technology, Texas A&M Health Science Center, Houston, Texas 77030, USA.

7 <sup>2</sup>Department of Biological Sciences, University of Texas at Dallas, Richardson, TX  
8 75080, USA.

9 <sup>3</sup>Department of Molecular Biology and Microbiology, Tufts University School of  
10 Medicine, Boston, MA 02111, USA.

11  
12 \*Correspondence and requests for materials should be addressed to J.G.H  
13 ([jhurdle@tamu.edu](mailto:jhurdle@tamu.edu)).

14 #These authors equally contributed. Author order was determined both alphabetically  
15 and in order of increasing seniority.

16  
17 **Running title:** Metronidazole resistance in *C. difficile*

18 **Keywords:** Drug resistance evolution, redox stress, iron metabolism

25 **Abstract**

26 Chromosomal resistance to metronidazole has emerged in clinical *Clostridioides*  
27 *difficile*, but the genetic mechanisms remain unclear. This is further hindered by the  
28 inability to generate spontaneous metronidazole-resistant mutants in the lab to aid  
29 genetic studies. We therefore constructed a mismatch repair mutator, in non-toxicogenic  
30 ATCC 700057, to unbiasedly survey the mutational landscape for *de novo* resistance  
31 mechanisms. In separate experimental evolutions, the mutator adopted a deterministic  
32 path to resistance, with truncation of ferrous iron transporter FeoB1 as a first-step  
33 mechanism of low level resistance. Allelic deletion of *feoB1* in ATCC 700057 reduced  
34 intracellular iron content, appearing to shift cells toward flavodoxin-mediated  
35 oxidoreductase reactions, which are less favorable for metronidazole's cellular action.  
36 Higher level resistance evolved from sequential acquisition of mutations to catalytic  
37 domains of pyruvate-ferredoxin oxidoreductase (PFOR encoded by *nifJ*); a synonymous  
38 codon change to *xdhA1* (xanthine dehydrogenase subunit A), likely affecting its  
39 translation; and lastly, frameshift and point mutations that inactivated the iron-sulfur  
40 cluster regulator (IscR). Gene silencing of *nifJ*, *xdhA1* or *iscR* with catalytically dead  
41 Cas9 revealed that resistance involving these genes only occurred when *feoB1* was  
42 inactivated i.e. resistance was only seen in an *feoB1*-deletion mutant and not the  
43 isogenic wild-type parent. These findings show that metronidazole resistance in *C.*  
44 *difficile* is complex, involving multi-genetic mechanisms that could intersect with iron-  
45 dependent metabolic pathways.

46

## 47 INTRODUCTION

48 *Clostridioides difficile* infection (CDI) is a leading cause of diarrhea in hospitalized  
49 patients in developed countries. Since 2003, the emergence and spread of epidemic  
50 strains has significantly increased the incidence and severity of CDI. The health care  
51 impact of the epidemic *C. difficile* strains is evident from there being about half a million  
52 cases of CDI and ~29,000 deaths in the United States in 2011 (1, 2).

53 Owing to its potent anti-anaerobic activity and low cost, metronidazole was  
54 traditionally preferred to treat mild to moderate CDI (3). Metronidazole is a 5-  
55 nitroimidazole prodrug that is primarily activated in anaerobes conducting reactions that  
56 generate low redox potentials (4). Enzymatic reduction of metronidazole occurs via  
57 reactions catalyzed by oxidoreductases, such as pyruvate-ferredoxin oxidoreductase  
58 (PFOR), and involves the transfer of electrons to its nitro group from cofactors like  
59 ferredoxin and flavodoxin. This produces an unstable nitroimidazole anion that may be  
60 converted to reactive desnitro, nitroso and hydroxylamine intermediates, which react  
61 with DNA, proteins and non-protein thiols to form adducts (4).

62 The efficacy of metronidazole has declined with the emergence of epidemic  
63 strains. Therefore, in the 2017 IDSA/SHEA treatment guidelines, metronidazole is no  
64 longer a first-line drug for adult CDI (5). However, there is a need for scientific evidence  
65 explaining the decline in metronidazole efficacy, as continued use of the drug is likely  
66 until the new guidelines become standard practice. The decline in metronidazole  
67 efficacy appears to correlate with the emergence and spread of resistant strains of  
68 different ribotype backgrounds (6-8); metronidazole resistance is defined by the  
69 EUCAST breakpoint of >2 µg/ml. For example, Snyderman reported that ~8% of U.S.

70 isolates (2011-2016) are resistant to metronidazole (7), while the rate in Europe ranged  
71 from 0.1% to 0.5% for isolates collected between 2011 to 2014 (6).

72 The foremost attempt to characterize the genetic basis for chromosomal  
73 metronidazole resistance in a clinical strain was by Lynch *et al.* (9). The patient isolate  
74 strain was isolated on metronidazole-containing agar, but was then passaged, *in vitro*,  
75 in drug and was found to contain mutations in PFOR, ferric uptake regulator (Fur) and  
76 the oxygen-independent coproporphyrinogen III oxidase (HemN) among other changes.  
77 In another study, Moura *et al.* evaluated a non-toxigenic metronidazole-resistant *C.*  
78 *difficile* showing it adjusted metabolic pathways that are linked to PFOR activity (10).  
79 Most recently, Boekhoud *et al.* (11) reported that *C. difficile* clinical isolates carried a  
80 conjugative plasmid (pCD-METRO) conferring resistance to metronidazole, but the  
81 plasmid was not present in several CDI associated ribotypes that were metronidazole-  
82 resistant. This indicates that pCD-METRO is not a universal mechanism of resistance;  
83 furthermore, the genetic determinants on pCD-METRO directly responsible for the  
84 phenotype are still unknown. Taken together, it appears *C. difficile* could have multiple  
85 ways to evolve metronidazole resistance, but these mechanisms remain unclear or  
86 require genetic and biochemical validation in naïve hosts. In contrast, mechanisms of  
87 MTZ resistance in several pathogens for which the drug is prescribed are known e.g.  
88 *Helicobacter pylori* and *Entamoeba histolytica* (4).

89 There have been two critical barriers to knowledge of metronidazole resistance  
90 in *C. difficile*. Firstly, metronidazole-resistant mutants are designated to be unstable, as  
91 evident by inconsistent metronidazole susceptibility profiles of the strains (9, 12).  
92 Secondly, there is an inability to select laboratory mutants to allow for controlled genetic

93 studies (13). To address these challenges, from a laboratory perspective, we  
94 constructed a mutator tool by deleting the DNA mismatch repair system in a non-  
95 toxigenic *C. difficile* strain. Mutators are employed for accelerated evolution to study  
96 mutation accumulation in bacteria (14, 15). Using this concept, we investigated the  
97 genomic landscape of *C. difficile* for *de novo* resistance mechanisms that are  
98 evolutionarily feasible, albeit *in vitro*. Hence, we obtained new insights that *C. difficile*  
99 can manipulate iron uptake and iron-dependent oxidoreductive pathways to develop  
100 resistance to metronidazole.

101

## 102 **RESULTS AND DISCUSSION**

103 **Hypermutator construction by deleting DNA mismatch repair (MMR) genes.** The  
104 MutSL MMR proteins are involved in correcting replicative errors (16), wherein MutS  
105 identifies mispaired or unpaired bases and recruits the endonuclease MutL that initiates  
106 the removal and repair of misincorporated bases (16). *C. difficile* was found to carry  
107 adjacent *mutS* and *mutL* genes (CD630\_19770 and CD630\_19760), in addition to the  
108 *mutS* homolog *mutS2* (CD630\_07090). To construct a *C. difficile* mutator, we chose the  
109 strain ATCC 700057 (17) because it is non-pathogenic, lacking the toxin genes *tcdA*  
110 and *tcdB* (18), and is widely used for antibiotic susceptibility testing (12). We individually  
111 deleted *mutS*, *mutL*, *mutS2* and the entire *mutSL* operon by allelic exchange using  
112 pMTL-SC7215; deletions were confirmed by PCR (19). Mutability was assessed from  
113 the frequency of isolating mutants to the antibiotics rifaximin and fidaxomicin at 4 x their  
114 MICs (0.5 and 0.25 µg/ml, respectively). As shown in **Fig. 1A** mutation frequencies were  
115 enhanced upon deletion of *mutS* or *mutL*, but *mutS2* had no effect. Deletion of *mutSL*

116 caused the highest increase (>80-fold) in mutability with respect to WT ATCC 700057  
117 i.e. mutation frequencies were  $10^{-6}$  for 700057 $\Delta$ *mutSL* versus  $10^{-8}$  for the WT ATCC  
118 700057; and this strain was significantly more mutable than  $\Delta$ *mutS* or  $\Delta$ *mutL* strains, as  
119 determined by unpaired t-tests (**Table S1**). Mutability was reversed when  
120 700057 $\Delta$ *mutSL* was complemented with WT *mutSL* (**Fig. S1**). Thus, 700057 $\Delta$ *mutSL*  
121 (i.e. mutator) was used to select metronidazole-resistant mutants below.

122

123 **Experimental evolution of metronidazole resistance.** The agar MICs of  
124 metronidazole against the WT and mutator was 0.25  $\mu$ g/ml. However, spontaneous  
125 mutants could not be selected by plating >10 overnight cultures of each strain onto  
126 agars containing 2 and 4 x MICs (*data not shown*). Both strains were therefore serially  
127 passaged on agars containing varying concentrations of metronidazole (0.125-16  
128  $\mu$ g/ml); each passage was incubated up to 3 days to obtain growth. In the first  
129 experimental evolution, by the 9<sup>th</sup> passage, the mutator evolved resistance as its  
130 population was inhibited by 2  $\mu$ g/ml (**Fig. 1B**). By the 15<sup>th</sup> passage, the population was  
131 inhibited at 8  $\mu$ g/ml. In contrast, stable mutants did not arise from the WT ATCC  
132 700057, even up to 15 serial passages in drug (**Fig. 1B**) and is consistent with prior  
133 reports of an inability to isolate *in vitro* metronidazole-resistant mutants of *C. difficile*  
134 (13). To further comprehend the evolutionary path to resistance, we conducted a  
135 separate experimental evolution with the mutator and identified that by the 6<sup>th</sup> and 17<sup>th</sup>  
136 passages the population was inhibited by 2 and 16  $\mu$ g/ml of drug, respectively (**Fig. 1B,**  
137 **C**).

138

139 **Identification of genetic changes associated with *de novo* metronidazole**  
140 **resistance.** As expected, the mutator accumulated insertions, substitutions and  
141 deletions across the genome and showed no genomic site specificity (**Fig. S2**).  
142 Functional gene classification showed that mutations occurred to iron transporters, iron-  
143 sulfur proteins, oxidoreductases, carbohydrate metabolism, fatty acid metabolism, cell  
144 surface/ division proteins and other genes (**Fig. S3**). However, to study mutations  
145 associated with resistance, we focused on proteins involved in cellular redox and metal  
146 homeostasis that may affect the activation of metronidazole.

147 **(i) Identification of genetic changes in evolution 1.** From the culture population at  
148 the endpoint of the evolution experiment 1 (passage 15), we isolated and genome  
149 sequenced three mutant colonies, designated as JWD-1 (MIC=8 µg/ml), JWD-2  
150 (MIC=32 µg/ml) and JWD-3 (MIC=32 µg/ml). They all carried a frameshifting deletion  
151 (Glu38fs) in the FeoB1, encoded by CD630\_14790; a substitution in PFOR (Gln<sub>803</sub>Arg)  
152 encoded by *nifJ* (CD630\_26820); and a synonymous change (AAG<sub>2070</sub>AAA) in xanthine  
153 dehydrogenase subunit *xdhA1*, encoded by CD630\_20730. JWD-2 and JWD-3 also  
154 carried unique changes of Lys<sub>51</sub>fs and Val<sub>76</sub>Ala respectively in the iron-sulfur cluster  
155 regulator (IscR), encoded by CD630\_12780. These mutations in IscR may explain why  
156 JWD-2 and JWD-3 were 4-fold more resistant to metronidazole than JWD-1, which  
157 lacked changes to the regulator. We identified the order in which mutations arose (**Fig.**  
158 **1C**) by determining the MICs and Sanger sequencing of three individual mutant colonies  
159 each from passages 10 and 13. Mutants from passage 10 had MICs of 2 µg/ml and  
160 carried the above variations in PFOR and FeoB1, while mutants (MICs of 8 µg/ml) from  
161 passage 13 also carried the synonymous change in *xdhA1*.

162 **(ii) Identification of genetic changes in evolution 2.** JWD-4 (MIC=64 µg/ml), an  
163 endpoint mutant (passage 17) of experiment 2 was isolated and genome sequenced.  
164 Similar to the above endpoint mutants, JWD-4 contained disruptions to FeoB1 (Glu<sub>40</sub>fs),  
165 PFOR (Pro<sub>32</sub>Leu) and IscR (Lys<sub>51</sub>fs), but also acquired a Gly<sub>270</sub>Asp substitution in  
166 xanthine permease (CD630\_20910). The order in which mutations arose (**Fig. 1C**) were  
167 also determined by MIC testing and Sanger sequencing of minimum three colonies per  
168 time point and metronidazole MICS were also measured. This revealed FeoB1 was  
169 disrupted by passage 4 (MIC=1 µg/ml); PFOR by passage 7 (MIC=2 µg/ml); xanthine  
170 permease by passage 14 (MIC=16 µg/ml); and IscR by passage 17 (MIC=64 µg/ml).  
171 The occurrence of similar genetic changes in the two independent serial passage  
172 experiments suggests there was a deterministic path to metronidazole resistance.

173

174 **Explanation of *de novo* genetic variations associated with metronidazole**  
175 **resistance.**

176 **(i) FeoB1 participation.** Under anaerobic conditions, iron mostly exists in ferrous (Fe<sup>2+</sup>)  
177 form. In *C. difficile*, FeoB1 is predicted to be the main iron transporter, as it is the most  
178 upregulated iron transporter in low iron conditions and *in vivo* in hamsters (20, 21). *In*  
179 *vitro*, the homologs FeoB2 and FeoB3 are thought to be less responsive to changes in  
180 iron (20). Thus, the loss of FeoB1 may have lowered the supply of iron to iron carrier  
181 proteins that mediate electron transfer to metronidazole (22). In support of our findings,  
182 deletion of *feoAB* in *B. fragilis* conferred a 10-fold decrease in metronidazole activity  
183 (23).

184



185 **(ii) Oxidoreductases PFOR and XDH participation.** PFOR catalyzes the oxidation of  
186 pyruvate to acetyl-CoA, while XdhA1 is the molybdenum-binding subunit of xanthine  
187 dehydrogenase (XDH) that catalyzes the oxidation of purines. Sequence alignment of  
188 PFOR homologs of *C. difficile* (CD630\_26820) and *Desulfovibrio africanus*  
189 (Desaf\_2186) (59.4% similarity) indicated that the Pro<sub>32</sub>Leu substitution occurred  
190 adjacent to the critical threonine-31 site that forms the catalytic domain for pyruvate  
191 binding, whereas Gln<sub>803</sub>Arg occurred in domain VI upstream of cysteine-815 that binds  
192 the proximal [4Fe-4S] cluster (24, 25) (**Fig. S4**). These substitutions likely affected the  
193 enzyme's catalytic activity, involving electron transfer to electron carrier proteins. To  
194 evaluate the synonymous change in *xdhA1*, we analyzed its secondary structure using  
195 the RNA folding algorithm mfold (26) to gauge potential effects on RNA translation. The  
196 AAG<sub>2070</sub>AAA change (**Fig. S5**) was predicted to introduce an unstable stem loop, with a  
197 positive free energy change ( $\Delta G = 3.8$  kcal/mol for the mutant and  $\Delta G = -25.9$  kcal/mol  
198 for the WT), which is unfavorable for RNA translation (27). With regard to xanthine  
199 permease, the role of this transporter in metronidazole resistance is presently unclear,  
200 although we speculate that Gly<sub>270</sub>Asp substitution might affect the supply of xanthine to  
201 XDH.

202 **(iii) IscR participation.** Iron-sulfur [Fe-S] clusters are essential to the biochemistry of  
203 several proteins that conduct electron transfer reactions (28, 29). In pathogenic bacteria  
204 the assembly and incorporation of [Fe-S] clusters is mostly controlled by the *isc* and *suf*  
205 operons, of which *isc* is the house-keeping system; furthermore, *C. difficile* lacks the *suf*  
206 operon (30). Holo-IscR binds DNA as a homodimer, but damage to its [4Fe-4S] by  
207 reactive free radicals or iron-starvation increases cellular levels of apo-IscR, triggering

208 defensive mechanisms including antioxidants such as cysteine and non-protein thiols  
209 (31). The Lys51fs variation, in strains JWD-2 and JWD-4, disabled the function of IscR,  
210 by forming an aberrant protein lacking cysteines-92, 98 and 104 that are required to  
211 bind [4Fe-4S] (32). To characterize the effect of the Val<sub>76</sub>Ala substitution in IscR in  
212 JWD-3, we analyzed the crystal structure of dimeric IscR bound to DNA from *E. coli*  
213 (pdb ID: 4CHU) using UCSF Chimera (33). The IscRs from *C. difficile* ATCC 700057  
214 and *E. coli* K12 are closely related with ~41% identical amino acids and valine-76 is a  
215 conserved amino acid. In the dimeric structure (**Fig. S6**), valine-76 on Chain A occurs  
216 with other lipophilic residues in a dimer interface where it hydrophobically interacts with  
217 leucine-113 on Chain B. It is plausible that the less hydrophobic alanine-76 reduces  
218 hydrophobic steric packing for stabilizing the dimeric DNA binding conformation of IscR.

219

## 220 **FeoB1-mediated cellular changes associated with metronidazole resistance.**

221 **(i) Deleting *feoB1* affects resistance and iron-content.** Since *feoB1* was inactivated  
222 early in the serial evolution (**Fig. 1C**), we first examined the role of this gene by deleting  
223 it in ATCC 700057. The deletion mutant (700057 $\Delta$ *feoB1*) grew in 0.5  $\mu$ g/ml of  
224 metronidazole (MIC=1  $\mu$ g/ml), whereas the WT strain grew in 0.125  $\mu$ g/ml (MIC=0.25  
225  $\mu$ g/ml) of drug (**Fig. 2A**). Susceptibility was restored by complementing the  $\Delta$ *feoB1*  
226 strain with WT *feoB1*, expressed from its own promoter in pMTL84151 (**Fig. 2A**). There  
227 was ~21% lesser iron content in the mutant ( $0.0753 \pm 0.002$  ppm) compared to the WT  
228 ( $0.0956 \pm 0.004$  ppm), as determined by ICP-OES. Consistent with reduced intracellular  
229 iron content, 700057 $\Delta$ *feoB1* also showed increased transcription of *fur* ( $3.9 \pm 0.17$ -fold)  
230 and ferrichrome ABC transporter subunit (*fhuB*) ( $5.13 \pm 0.25$ -fold), compared to the WT,

231 in the absence of drug (**Fig. 2B**). In drug, the  $\Delta feoB1$  mutant showed  $10.50 \pm 0.96$  (*fur*)  
232 and  $9.16 \pm 0.25$  (*fhuB*) fold higher gene expression than the WT (**Fig. 2B**).

233

234 **(ii) Effect on expression of cofactors that activate metronidazole.** Since the loss of  
235 *feoB1* reduced iron content in cells, we reasoned this may diminish metronidazole  
236 activation by limiting iron-dependent electron carrier proteins such as ferredoxins.  
237 Ferredoxin and flavodoxin are small redox proteins that accept and transfer electrons to  
238 metronidazole from oxidoreductases, such as PFOR. Transcriptional analysis revealed  
239 that in the absence of drug, 700057 $\Delta feoB1$  downregulated ( $-2.46 \pm 0.09$ -fold) the  
240 ferredoxin (*fdx* i.e. CD630\_06271) and upregulated ( $2.04 \pm 0.06$ -fold) the flavodoxin  
241 (*fldx* i.e. CD630\_19990) relative to WT (**Fig. 2C**). When 700057 $\Delta feoB1$  was exposed to  
242 metronidazole, there was further downregulation of *fdx* ( $-7.51 \pm 0.21$ -fold) and  
243 upregulation of *fldx* ( $6.860 \pm 0.43$ -fold) (**Fig. 2C**). Other ferredoxin and flavodoxin  
244 homologs (**Fig. S7**) were lesser expressed supporting published studies that  
245 CD630\_06271 and CD630\_19990 are the most responsive homologs of ferredoxin and  
246 flavodoxin, during iron stress in *C. difficile* (20, 21). Ferredoxin is better at transferring  
247 electrons to metronidazole, due to carriage of an iron-sulfur cluster that has a lower  
248 redox potential than flavodoxin, which carries flavin mononucleotide (34). Thus, these  
249 results indicate that loss of *feoB1* led to reduced iron content, prompting a shift to  
250 flavodoxin-mediated oxidoreductase reactions that enable cells to resist metronidazole.

251

252 **(iii) Effect on cellular accumulation of nitroimidazole.** Since the above results  
253 suggest the loss of *feoB1* might decrease metronidazole activation, we quantified the

254 intracellular concentration of dimetridazole, a related nitroimidazole (35). Dimetridazole  
255 was used due to the commercial availability of 5-amino-1,2-dimethylimidazole, a likely  
256 end-product of dimetridazole activation (35) that could be used as a standard in the LC-  
257 MS/MS. Against dimetridazole, 700057 $\Delta$ *feoB1* showed the same level of resistance to  
258 metronidazole (i.e. MIC=1  $\mu$ g/ml). Concentrated cells were exposed to 1 mM of  
259 dimetridazole for 1 hour and intracellular concentrations measured in cell lysates. In  
260 700057 $\Delta$ *feoB1*, there was  $7.31 \pm 0.53$   $\mu$ M of dimetridazole (**Fig. 2D**), which represents  
261 about 34% lower intracellular drug accumulation, compared to the WT ( $11.07 \pm 1.26$   
262  $\mu$ M). The accumulation of metronidazole and other nitroimidazoles into bacteria is  
263 thought to occur in a concentration-dependent manner, whereby as the drug is activated  
264 in cells more drug is taken up (36). Thus, the observed lower intracellular accumulation  
265 of dimetridazole in 700057 $\Delta$ *feoB1* might indicate lesser drug activation, which could be  
266 expected with a shift to flavodoxin-mediated metabolism. However, we could not detect  
267 the amine end-product, which would have provided a measure of drug activation.

268

269 **Resistance mediated by *nifJ*, *xdhA1* and *iscR* appear to require the loss of *feoB1*.**

270 To assess the roles played by *nifJ*, *xdhA1* and *iscR* in metronidazole resistance, we  
271 silenced these genes using a xylose-inducible CRISPR-interference vector. In this  
272 approach, fusion of antisense nucleotides to the guide RNA of Cas9 blocks gene  
273 transcription (37) and is a more facile approach than gene deletions in *C. difficile*. As a  
274 positive control, an antisense to *feoB1* was included to measure the effect of gene  
275 silencing on growth in metronidazole. Even though gene silencing reduced transcript  
276 levels by ~10-fold (**Fig. 3A**), resistance was only detected in the strain expressing the

277 *feoB1* antisense (MIC = 1  $\mu$ g/ml); the strain carrying the empty vector was inhibited by  
278 0.25  $\mu$ g/ml (**Fig. 3B**). Given that *feoB1* mutants arose early in the passages (**Fig. 1C**,  
279 we therefore questioned whether expression of resistance involving *nifJ*, *xdhA1* or *iscR*  
280 required the loss of *feoB1*. As shown in **Fig. 3C**, the abovementioned antisenses  
281 enhanced survival of 700057 $\Delta$ *feoB1*, shifting MICs to 8  $\mu$ g/ml. Thus, the loss of *feoB1*  
282 early in the serial evolution, might have influenced the direction of resistance evolution  
283 toward genes that when disrupted took advantage of lower iron content (i.e.  
284 combinatorial or epistatic resistance).

285 To confirm that combinatorial resistance was more protective, we exposed cells  
286 to 8  $\mu$ g/ml of metronidazole and analyzed effects on DNA integrity, non-protein thiols  
287 and transcription of redox-responsive genes (38, 39). The combinatorial-resistant  
288 strains showed more intact DNA, while damage was seen to the DNA of 700057 $\Delta$ *feoB1*,  
289 but was more marked in WT strain (**Fig. 4A**). Likewise, there were higher amounts of  
290 free-non-protein thiols in combinatorial-resistant strains (**Fig. 4B**), suggesting a decline  
291 in formation of covalent adducts with activated metronidazole. Combinatorial-resistant  
292 strains also showed reduced transcription of the DNA damage response gene *recA*  
293 (CD630\_13280); and redox stress responsive genes (hybrid cluster protein,  
294 CD630\_21680 and thioredoxin A, CD630\_30330) (**Fig. 4C**). Taken together, these  
295 results confirm the role of *feoB1* in the evolution of a novel epistatic mechanism of  
296 metronidazole resistance. Epistatic mechanisms of antimicrobial resistance are also  
297 seen in fluoroquinolone-resistant *E. coli*, with double mutations to gyrase A and  
298 topoisomerase IV, which produce high-level resistance that is greater than predicted  
299 from individual mutations (40).

300

301 **Further assessment of the function of IscR in resistance.** As IscR has not been  
302 previously linked to metronidazole resistance, we further investigated its role by  
303 focusing on pyruvate-lactate metabolism that is affected by iron-sulfur metabolism and  
304 is indicative of metronidazole resistance in *B. fragilis* (41). Depletion of *iscR* mRNA in  
305 700057 $\Delta$ *feoB1* further diminished the transcription of *nifJ* ( $-6.17 \pm 0.29$ -fold), which was  
306 already marginally reduced ( $-2.67 \pm 0.18$ -fold) with the loss of *feoB1* in 700057 $\Delta$ *feoB1*  
307 compared to WT (**Fig. 5A**). The strain bearing the *iscR* antisense also showed  
308 increased levels of pyruvate ( $1.33 \pm 0.03$  nM) and lactate ( $1.86 \pm 0.08$  nM) compared  
309 the parent 700057 $\Delta$ *feoB1* ( $0.98 \pm 0.02$  nM and  $1.13 \pm 0.045$  nM respectively) (**Fig. 5B**).  
310 This can be expected if downregulation of *nifJ* further reduced the levels of PFOR  
311 protein in cells, which would concomitantly decrease metronidazole activation by the  
312 enzyme. Furthermore, a reduction in PFOR activity may also drive the conversion of  
313 pyruvate to lactate via lactate dehydrogenase. Therefore, it appears that loss of *iscR* at  
314 the endpoint of the evolution (**Fig. 1C**) affected iron-sulfur dependent electron transfer  
315 reactions and synergized with both the loss of *feoB1* and mutated oxidoreductase  
316 enzymes, which occurred at the earlier evolutionary steps. To confirm the hypothesis  
317 that loss of *iscR* affected electron transfer reactions, we tested the susceptibility of cells  
318 to the electron acceptor plumbagin, a naphthoquinone that is reduced in reactions  
319 catalyzed by oxidoreductases (42). In *Xanthomonas campestris*, the loss of *iscR* led to  
320 plumbagin resistance (43). Our results show that WT ATCC 700057 was inhibited by  
321 0.5  $\mu$ g/ml of plumbagin, while moderate resistance was seen in 700057 $\Delta$ *feoB1* (MIC=2  
322  $\mu$ g/ml). Depletion of *iscR* mRNA in 700057 $\Delta$ *feoB1* further elevated resistance to

323 plumbagin (MIC=8 µg/ml), in a manner analogous to above observations for  
324 metronidazole (**Fig. 5C**).

325

## 326 **CONCLUSION**

327 The involvement of mutations to multiple genes might partly explain why *C. difficile* was  
328 slow to evolve chromosomal resistance to metronidazole, in spite of the drug being  
329 used since 1980s. While mutations to *feoB1* and oxidoreductases are known to  
330 individually cause metronidazole resistance in other organisms (4), to the best of our  
331 knowledge there are no reports of epistatic interactions between these mechanisms.  
332 Nonetheless, our results generated a model (**Fig. 6**) of metronidazole resistance that  
333 could help interpret genetic changes seen in *C. difficile* clinical isolates, which lack pCD-  
334 METRO (11). For example, our model in **Fig. 6** generally explains the mechanism of  
335 mutations seen a metronidazole-resistant NAP1 *C. difficile* (9, 44); in that study, the  
336 strain had mutations to Fur and PFOR (Gly<sub>423</sub>Glu). Disruption of Fur might have affected  
337 iron homeostasis to reduce drug susceptibility, which is also shown in *H. pylori* (45).  
338 Similarly, the amino acid change in PFOR occurred in domain III, an important subunit  
339 for binding of the coenzyme A substrate (25). However, we recognize that FeoB1 is  
340 essential for colonization and virulence in other bacteria, which makes it improbable that  
341 *C. difficile* will inactivate *feoB1 in vivo* during metronidazole therapy. This raises an  
342 important question of whether there are lower free iron concentrations in the  
343 gastrointestinal tract that may provide a milieu for resistance to be exhibited by strains  
344 with mutated oxidoreductases such as PFOR. Conversely, such resistant strains could  
345 be difficult to detect, as current susceptibility testing methods for *C. difficile* use iron-rich

346 medium, and may be categorized as susceptible. Indeed, ineffective detection of  
347 metronidazole-resistant *C. difficile* has also been a major concern (9, 12).

348 A number of outstanding questions remain concerning the apparent multi-genetic  
349 mechanisms of metronidazole resistance. Certainly, it is important to establish which  
350 resistance mechanisms do or do not impose physiological costs, as this factor might  
351 influence the future clinical prevalence of strains. There is also a need to identify  
352 whether there are metronidazole-resistant *C. difficile* that also resist oxidative stress, as  
353 is known in metronidazole-resistant *H. pylori* and *E. histolytica* that upregulate  
354 superoxide dismutase (46, 47). Therefore, in the aftermath of metronidazole use for  
355 adult CDI, studies are still warranted to assess the extent to which metronidazole  
356 resistance could shape *C. difficile* evolution, epidemiology and pathophysiology.

357

## 358 **MATERIALS AND METHODS**

359 **Strains and culture conditions.** Non-toxigenic *C. difficile* ATCC 700057 and derivative  
360 strains were routinely grown in pre-reduced Brain Heart Infusion (BHI) broth or agar at  
361 37°C in a Whitley A35 anaerobic workstation (Don Whitley Scientific). *Escherichia coli*  
362 strains NEB 5-alpha, CA434 and SD46 were grown at 37°C in LB broth or agar. All  
363 strains and plasmids used in this study are listed in **Table S2**. D-cycloserine (250  
364 µg/ml), cefoxitin (8 µg/ml), and thiamphenicol (15 µg/ml) were used to selectively culture  
365 *C. difficile* containing plasmids, whereas chloramphenicol (15 µg/ml) and ampicillin (50  
366 µg/ml) or kanamycin (50 µg/ml) were used to grow *E. coli* SD46 and CA4343  
367 respectively. Wherever needed, data was normalized to the protein content.

368



369 **Antimicrobial susceptibility.** Agar MICs were determined on BHI agar supplemented  
370 with hemin (5 µg/ml) and used an inocula of 10<sup>5</sup> CFU/ml. Agars contained doubling  
371 dilutions of compound from 0.06 to 64 µg/ml.

372

373 **Genetic manipulation of *C. difficile*.** The vector pMTL-SC7215 was used to delete  
374 target genes in *C. difficile* by allelic exchange (19). Allelic exchange vectors to delete  
375 *mutS*, *mutS2*, *mutSL*, *mutL* and *feoB1* were conjugated into *C. difficile* via *E. coli* donor  
376 strains (CA434 or SD46). Allelic exchange was conducted as described (19).  
377 Successful gene knockouts were confirmed by PCR. For complementation, *feoB1* was  
378 synthesized and cloned into XmaI and XbaI sites of the vector pMTL-84151 by  
379 Genscript. Primers used in the study are in **Table S3**. The designed allelic cassettes  
380 used in this study are described in the supplementary **Table S4**.

381

382 **Gene knockdown.** The xylose-inducible vector pXWpxyl-*dcas9* was used to silence  
383 the transcription of *feoB1*, *nifJ*, *iscR* and *xdhA1*, as previously described (37). The  
384 sgRNA (**Table S5**) targeting the abovementioned genes were synthesized and cloned  
385 into the vector's PmeI site by Genscript Biotech (New Jersey). Antisenses were induced  
386 with 2% w/v of xylose.

387

388 **Determination of mutation frequencies.** Briefly, *C. difficile* strains were grown  
389 overnight in BHI broth, centrifuged and concentrated 10-fold. Aliquots (0.1 ml) of each  
390 culture were plated onto pre-reduced BHI agar plates containing 0.32 µg/ml fidaxomicin  
391 or 0.5 µg/ml rifaximin, representing 4 x MICs. Similarly, WT and mutator cultures (>10

392 each) were concentrated and plated onto agar plates containing 2 or 4 x MIC (i.e. 0.5 or  
393 1 µg/ml of metronidazole). After 48 hours of incubation, the mutation frequencies were  
394 calculated as the number of resistant colonies divided by total viable counts.

395

396 **Experimental evolution by serial passaging.** From an overnight culture on agar, *C.*  
397 *difficile* colonies were resuspended into 1 ml of BHI broth to produce an optical density  
398 of OD<sub>600nm</sub> of ~0.8-1.0. At each passage step, an aliquot of 0.01 ml (inocula of 10<sup>5</sup>-10<sup>6</sup>  
399 CFU/mL) was spread onto BHI agars containing 0.25 to 64 x MIC of metronidazole.  
400 After 48 to 72 hours of incubation, colonies were isolated from the highest concentration  
401 permitting visible growth and were resuspended in fresh broth, before passaging the  
402 suspension onto higher drug concentrations. The remaining was stored in glycerol.

403

404 **Genome sequencing and analysis.** Whole genome sequencing was done by paired  
405 end sequencing at SeqMatics LLC (California) and MRDNA (Texas). CLC Genomics  
406 Workbench version 12 (Qiagen) was used to *de novo* assemble WT ATCC 700057. The  
407 assembled genome of the WT was annotated using Rapid Annotation using Subsystem  
408 Technology (RAST) [49] and was used for mapping the mutator 700057Δ*mutSL* and  
409 metronidazole-resistant mutants (JWD-1, JWD-2, JWD-3 and JWD-4). Sequence  
410 variations were identified using “Quality-based variant detection” tool in CLC Genomics  
411 Workbench with default parameters (≥10-fold coverage of the reference position and  
412 sequence variation ≥35% of mapped reads). Mutations detected in the endpoint  
413 mutants, compared to the WT, were screened against the 700057Δ*mutSL* to remove  
414 shared variations, to focus on those that arose during the evolutions. For confirmation,

415 the variations in  $\geq 90\%$  of mapped reads were further analyzed manually. The coverage  
416 for each genomic location was calculated in the CLC software and zero coverage  
417 regions were then identified using a customized perl script. Genetic changes were  
418 confirmed by Sanger sequencing.

419 **Growth kinetics of genetically manipulated strains.** Two-fold serial dilutions of drugs  
420 was made in sterile pre-reduced BHI broth and 2% sterile xylose was used to induce  
421 antisense expression. Overnight grown cultures were diluted 1:100 and inocula ( $OD_{600}$   
422  $\sim 0.3$ ) was added to the pre-reduced 96 well plates and incubated in an anaerobic  
423 chamber for 24 hours. Plates were read for Absorbance<sub>600</sub> using Synergy H1 Microplate  
424 Reader (BioTek).

425

426 **Quantification of intracellular iron by ICP-OES.** Overnight grown cells were  
427 subcultured (1:100) in fresh BHI broth and harvested after 6 h for ICP-OES analysis to  
428 determine the cellular iron levels. Samples were washed twice, centrifuged at 5000 rpm  
429 and air dried. Samples were first digested in a microwave at 250°C at an initial  
430 pressure of 40 bar, at 250°C the pressure was about 80 bar. Precisely weighed samples  
431 were loaded into the digestion tube and 4 ml 16N HNO<sub>3</sub> was added. After digestion,  
432 concentrated HNO<sub>3</sub> was evaporated at 100°C, before addition of 5 ml 2% HNO<sub>3</sub> and  
433 heating at 120°C to re-dissolve the samples. After weighing, iron content was  
434 measured with Agilent 725 ICP-OES. Calibration curves were made using standard  
435 solutions of iron at concentrations of 5 ppb-500 ppb.

436

437 **LC-MS/MS analysis of cellular lysates.** Ten-fold concentrated, logarithmically growing  
438 cells ( $OD_{600} \sim 0.3$ ) were exposed to dimetridazole 1 mM and samples were harvested  
439 after 1 hour of incubation. Cellular lysates (10  $\mu$ l) were mixed with methanol (90  $\mu$ l),  
440 vortexed and centrifuged at 15,000 x g for 10 min. Supernatant (5  $\mu$ l) was injected on to  
441 UHPLC-Q Exactive MS system for analysis. The concentration of dimetridazole was  
442 calculated based on the standard curve; further details are found in the supplementary.

443

444 **Analysis of DNA damage.** Samples were harvested as above, after exposing to  
445 metronidazole 8  $\mu$ g/ml and DNA damage was analyzed by alkaline agarose gel  
446 electrophoresis as described (48), except for the following changes. The lysis buffer  
447 contained lysozyme (0.5 mg/ml) and the agarose plugs were incubated at 37° C for 4 h.  
448 0.5% v/v of hydrogen peroxide was a positive control to assess DNA fragmentation.

449

450 **Quantification of non-protein thiols.** Samples harvested as above, were processed in  
451 5% w/v trichloroacetic acid as previously described (38). Thiol content was then  
452 measured using the Thiol Fluorescent Detection Kit (Invitrogen), according to the  
453 manufacturer's instructions.

454

455 **Transcriptional analysis.** After harvesting the samples as above, bacterial  
456 RNeasy Protect™ reagent (QIAGEN) was then added to cultures and RNA isolated using  
457 Qiagen's RNeasy mini kit. RNA was converted to cDNA by M-MLV reverse  
458 transcriptase (Quantabio) using qScript cDNA SuperMix. qScript One-Step SYBR  
459 Green qRT-PCR Kit, ROX (Quantabio) and gene-specific primers were used to amplify

460 genes in Applied Biosystems ViiA7 real-time PCR machine. Transcript levels were  
461 calculated by the comparative Ct Method ( $\Delta\Delta$ CT method) and data normalized to 16S  
462 rRNA.

463

464 **Quantification of lactate and pyruvate.** Samples were harvested as above; lactate  
465 and pyruvate were detected using Pyruvate Colorimetric/Fluorometric Assay kit  
466 (Biovison) and Lactate-Glo™ Assay kit (Promega).

467

468 **ACKNOWLEDGEMENTS.** This work was in part funded by grants R56AI126881 and  
469 R01AI139261 to J.G.H. from the National Institute of Allergy and Infectious Diseases at  
470 the National Institutes of Health. The funders had no role in study design, data collection  
471 and interpretation of the findings, or in the writing and submission of the manuscript.

472 ICP-OES analysis was conducted at the ICP lab, Department of Earth and Atmospheric  
473 Sciences, University of Houston, Texas. LC-MS/MS analysis was performed at NMR  
474 and Drug Metabolism core, Advanced Technology Core, Baylor College of Medicine,  
475 Houston, Texas.

476

477

478 **REFERENCES**

- 479 1. Lessa FC, Mu Y, Bamberg WM, Beldavs ZG, Dumyati GK, Dunn JR, Farley MM,  
480 Holzbauer SM, Meek JI, Phipps EC, Wilson LE, Winston LG, Cohen JA, Limbago BM,  
481 Fridkin SK, Gerding DN, McDonald LC. 2015. Burden of *Clostridium difficile* infection in  
482 the United States. *N Engl J Med* 372:825-34.
- 483 2. Freeman J, Bauer MP, Baines SD, Corver J, Fawley WN, Goorhuis B, Kuijper EJ, Wilcox  
484 MH. 2010. The changing epidemiology of *Clostridium difficile* infections. *Clin Microbiol*  
485 *Rev* 23:529-49.
- 486 3. Pelaez T, Alcalá L, Alonso R, Rodríguez-Creixems M, García-Lechuz JM, Bouza E.  
487 2002. Reassessment of *Clostridium difficile* susceptibility to metronidazole and  
488 vancomycin. *Antimicrob Agents Chemother* 46:1647-50.
- 489 4. Dingsdag SA, Hunter N. 2018. Metronidazole: an update on metabolism, structure-  
490 cytotoxicity and resistance mechanisms. *J Antimicrob Chemother* 73:265-279.
- 491 5. McDonald LC, Gerding DN, Johnson S, Bakken JS, Carroll KC, Coffin SE, Dubberke  
492 ER, Garey KW, Gould CV, Kelly C, Loo V, Shaklee Sammons J, Sandora TJ, Wilcox  
493 MH. 2018. Clinical Practice Guidelines for *Clostridium difficile* Infection in Adults and  
494 Children: 2017 Update by the Infectious Diseases Society of America (IDSA) and  
495 Society for Healthcare Epidemiology of America (SHEA). *Clin Infect Dis* 66:e1-e48.
- 496 6. Freeman J, Vernon J, Pilling S, Morris K, Nicholson S, Shearman S, Longshaw C,  
497 Wilcox MH, Pan-European Longitudinal Surveillance of Antibiotic Resistance among  
498 Prevalent *Clostridium difficile* Ribotypes Study G. 2018. The ClosER study: results from  
499 a three-year pan-European longitudinal surveillance of antibiotic resistance among  
500 prevalent *Clostridium difficile* ribotypes, 2011-2014. *Clin Microbiol Infect* 24:724-731.
- 501 7. Thorpe CM, McDermott LA, Tran MK, Chang J, Jenkins SG, Goldstein EJC, Patel R,  
502 Forbes BA, Johnson S, Gerding DN, Snyderman DR. 2019. U.S.-Based National

- 503 Surveillance for Fidaxomicin Susceptibility of *Clostridioides difficile*-Associated Diarrheal  
504 Isolates from 2013 to 2016. *Antimicrob Agents Chemother* 63.
- 505 8. Adler A, Miller-Roll T, Bradenstein R, Block C, Mendelson B, Parizade M, Paitan Y,  
506 Schwartz D, Peled N, Carmeli Y, Schwaber MJ. 2015. A national survey of the molecular  
507 epidemiology of *Clostridium difficile* in Israel: the dissemination of the ribotype 027 strain  
508 with reduced susceptibility to vancomycin and metronidazole. *Diagn Microbiol Infect Dis*  
509 83:21-4.
- 510 9. Lynch T, Chong P, Zhang J, Hizon R, Du T, Graham MR, Beniac DR, Booth TF, Kibsey  
511 P, Miller M, Gravel D, Mulvey MR, Canadian Nosocomial Infection Surveillance P. 2013.  
512 Characterization of a stable, metronidazole-resistant *Clostridium difficile* clinical isolate.  
513 *PLoS One* 8:e53757.
- 514 10. Moura I, Monot M, Tani C, Spigaglia P, Barbanti F, Norais N, Dupuy B, Bouza E,  
515 Mastrantonio P. 2014. Multidisciplinary analysis of a nontoxigenic *Clostridium difficile*  
516 strain with stable resistance to metronidazole. *Antimicrob Agents Chemother* 58:4957-  
517 60.
- 518 11. Boekhoud IM, Hornung BVH, Sevilla E, Harmanus C, Bos-Sanders I, Terveer EM, Bolea  
519 R, Corver J, Kuijper EJ, Smits WK. 2020. Plasmid-mediated metronidazole resistance in  
520 *Clostridioides difficile*. *Nat Commun* 11:598.
- 521 12. Moura I, Spigaglia P, Barbanti F, Mastrantonio P. 2013. Analysis of metronidazole  
522 susceptibility in different *Clostridium difficile* PCR ribotypes. *J Antimicrob Chemother*  
523 68:362-5.
- 524 13. Kumar M, Adhikari S, Hurdle JG. 2014. Action of nitroheterocyclic drugs against  
525 *Clostridium difficile*. *Int J Antimicrob Agents* 44:314-9.
- 526 14. Canfield GS, Schwingel JM, Foley MH, Vore KL, Boonantananasarn K, Gill AL, Sutton  
527 MD, Gill SR. 2013. Evolution in fast forward: a potential role for mutators in accelerating  
528 *Staphylococcus aureus* pathoadaptation. *J Bacteriol* 195:615-28.

- 529 15. Long H, Miller SF, Strauss C, Zhao C, Cheng L, Ye Z, Griffin K, Te R, Lee H, Chen CC,  
530 Lynch M. 2016. Antibiotic treatment enhances the genome-wide mutation rate of target  
531 cells. Proc Natl Acad Sci U S A 113:E2498-505.
- 532 16. Lenhart JS, Pillon MC, Guarne A, Biteen JS, Simmons LA. 2015. Mismatch repair in  
533 Gram-positive bacteria. Res Microbiol doi:10.1016/j.resmic.2015.08.006.
- 534 17. Leeds JA, Sachdeva M, Mullin S, Barnes SW, Ruzin A. 2014. In vitro selection, via serial  
535 passage, of *Clostridium difficile* mutants with reduced susceptibility to fidaxomicin or  
536 vancomycin. J Antimicrob Chemother 69:41-4.
- 537 18. Zhou Y, Mao L, Yu J, Lin Q, Luo Y, Zhu X, Sun Z. 2019. Epidemiology of *Clostridium*  
538 *difficile* infection in hospitalized adults and the first isolation of *C. difficile* PCR ribotype  
539 027 in central China. BMC Infect Dis 19:232.
- 540 19. Cartman ST, Kelly ML, Heeg D, Heap JT, Minton NP. 2012. Precise manipulation of the  
541 *Clostridium difficile* chromosome reveals a lack of association between the tcdC  
542 genotype and toxin production. Appl Environ Microbiol 78:4683-90.
- 543 20. Ho TD, Ellermeier CD. 2015. Ferric Uptake Regulator Fur Control of Putative Iron  
544 Acquisition Systems in *Clostridium difficile*. J Bacteriol 197:2930-40.
- 545 21. Hastie JL, Hanna PC, Carlson PE. 2018. Transcriptional response of *Clostridium difficile*  
546 to low iron conditions. Pathog Dis 76.
- 547 22. Yeom J, Imlay JA, Park W. 2010. Iron homeostasis affects antibiotic-mediated cell death  
548 in *Pseudomonas* species. J Biol Chem 285:22689-95.
- 549 23. Veeranagouda Y, Husain F, Boente R, Moore J, Smith CJ, Rocha ER, Patrick S, Wexler  
550 HM. 2014. Deficiency of the ferrous iron transporter FeoAB is linked with metronidazole  
551 resistance in *Bacteroides fragilis*. J Antimicrob Chemother 69:2634-43.
- 552 24. Pieulle L, Magro V, Hatchikian EC. 1997. Isolation and analysis of the gene encoding the  
553 pyruvate-ferredoxin oxidoreductase of *Desulfovibrio africanus*, production of the



- 554 recombinant enzyme in *Escherichia coli*, and effect of carboxy-terminal deletions on its  
555 stability. J Bacteriol 179:5684-92.
- 556 25. Chen PY, Aman H, Can M, Ragsdale SW, Drennan CL. 2018. Binding site for coenzyme  
557 A revealed in the structure of pyruvate:ferredoxin oxidoreductase from *Moorella*  
558 *thermoacetica*. Proc Natl Acad Sci U S A 115:3846-3851.
- 559 26. Zuker M. 2003. Mfold web server for nucleic acid folding and hybridization prediction.  
560 Nucleic Acids Res 31:3406-15.
- 561 27. Digby W SaD. 1999. mRNAs have greater negative folding free energies than shuffled or  
562 codon choice randomized sequences. Nucl Acid Research 27:1578-1584.
- 563 28. Yeo WS, Lee JH, Lee KC, Roe JH. 2006. IscR acts as an activator in response to  
564 oxidative stress for the suf operon encoding Fe-S assembly proteins. Mol Microbiol  
565 61:206-18.
- 566 29. Giel JL, Rodionov D, Liu M, Blattner FR, Kiley PJ. 2006. IscR-dependent gene  
567 expression links iron-sulphur cluster assembly to the control of O<sub>2</sub>-regulated genes in  
568 *Escherichia coli*. Mol Microbiol 60:1058-75.
- 569 30. Andre G, Haudecoeur E, Courtois E, Monot M, Dupuy B, Rodionov DA, Martin-  
570 Verstraete I. 2017. Cpe1786/IscR of *Clostridium perfringens* represses expression of  
571 genes involved in Fe-S cluster biogenesis. Res Microbiol 168:345-355.
- 572 31. Santos JA, Alonso-Garcia N, Macedo-Ribeiro S, Pereira PJ. 2014. The unique regulation  
573 of iron-sulfur cluster biogenesis in a Gram-positive bacterium. Proc Natl Acad Sci U S A  
574 111:E2251-60.
- 575 32. Fleischhacker AS, Stubna A, Hsueh KL, Guo Y, Teter SJ, Rose JC, Brunold TC, Markley  
576 JL, Munck E, Kiley PJ. 2012. Characterization of the [2Fe-2S] cluster of *Escherichia coli*  
577 transcription factor IscR. Biochemistry 51:4453-62.

- 578 33. Pettersen EF, Goddard TD, Huang CC, Couch GS, Greenblatt DM, Meng EC, Ferrin TE.  
579 2004. UCSF Chimera--a visualization system for exploratory research and analysis. J  
580 Comput Chem 25:1605-12.
- 581 34. Guerlesquin MBaFo. 1988. Structure, function and evolution of bacterial ferredoxins.  
582 FEMS Microbiology Reviews 54 155-176.
- 583 35. Carlier JP, Sellier N, Rager MN, Reysset G. 1997. Metabolism of a 5-nitroimidazole in  
584 susceptible and resistant isogenic strains of *Bacteroides fragilis*. Antimicrob Agents  
585 Chemother 41:1495-9.
- 586 36. Cudmore SL, Delgaty KL, Hayward-McClelland SF, Petrin DP, Garber GE. 2004.  
587 Treatment of infections caused by metronidazole-resistant *Trichomonas vaginalis*. Clin  
588 Microbiol Rev 17:783-93, table of contents.
- 589 37. Marreddy RKR, Wu X, Sapkota M, Prior AM, Jones JA, Sun D, Hevener KE, Hurdle JG.  
590 2019. The Fatty Acid Synthesis Protein Enoyl-ACP Reductase II (FabK) is a Target for  
591 Narrow-Spectrum Antibacterials for *Clostridium difficile* Infection. ACS Infect Dis 5:208-  
592 217.
- 593 38. Leitsch D, Kolarich D, Wilson IB, Altmann F, Duchene M. 2007. Nitroimidazole action in  
594 *Entamoeba histolytica*: a central role for thioredoxin reductase. PLoS Biol 5:e211.
- 595 39. Leitsch D, Schlosser S, Burgess A, Duchene M. 2012. Nitroimidazole drugs vary in their  
596 mode of action in the human parasite *Giardia lamblia*. Int J Parasitol Drugs Drug Resist  
597 2:166-70.
- 598 40. Huseby DL, Pietsch F, Brandis G, Garoff L, Tegehall A, Hughes D. 2017. Mutation  
599 Supply and Relative Fitness Shape the Genotypes of Ciprofloxacin-Resistant  
600 *Escherichia coli*. Mol Biol Evol 34:1029-1039.
- 601 41. de Freitas MC, Resende JA, Ferreira-Machado AB, Saji GD, de Vasconcelos AT, da  
602 Silva VL, Nicolas MF, Diniz CG. 2016. Exploratory Investigation of *Bacteroides fragilis*

- 603           Transcriptional Response during *In vitro* Exposure to Subinhibitory Concentration of  
604           Metronidazole. *Front Microbiol* 7:1465.
- 605   42.   Imlay J, Fridovich I. 1992. Exogenous quinones directly inhibit the respiratory NADH  
606           dehydrogenase in *Escherichia coli*. *Arch Biochem Biophys* 296:337-46.
- 607   43.   Fuangthong M, Jittawuttipoka T, Wisitkamol R, Romsang A, Duang-nkern J,  
608           Vattanaviboon P, Mongkolsuk S. 2015. IscR plays a role in oxidative stress resistance  
609           and pathogenicity of a plant pathogen, *Xanthomonas campestris*. *Microbiol Res*  
610           170:139-46.
- 611   44.   Chong PM, Lynch T, McCorrister S, Kibsey P, Miller M, Gravel D, Westmacott GR,  
612           Mulvey MR, Canadian Nosocomial Infection Surveillance P. 2014. Proteomic analysis of  
613           a NAP1 *Clostridium difficile* clinical isolate resistant to metronidazole. *PLoS One*  
614           9:e82622.
- 615   45.   Choi SS, Chivers PT, Berg DE. 2011. Point mutations in *Helicobacter pylori*'s fur  
616           regulatory gene that alter resistance to metronidazole, a prodrug activated by chemical  
617           reduction. *PLoS One* 6:e18236.
- 618   46.   Samarawickrema NA, Brown DM, Upcroft JA, Thammapalerd N, Upcroft P. 1997.  
619           Involvement of superoxide dismutase and pyruvate:ferredoxin oxidoreductase in  
620           mechanisms of metronidazole resistance in *Entamoeba histolytica*. *J Antimicrob*  
621           Chemother 40:833-40.
- 622   47.   Tsugawa H, Suzuki H, Satoh K, Hirata K, Matsuzaki J, Saito Y, Suematsu M, Hibi T.  
623           2011. Two amino acids mutation of ferric uptake regulator determines *Helicobacter pylori*  
624           resistance to metronidazole. *Antioxid Redox Signal* 14:15-23.
- 625   48.   Zirkle RE, Krieg NR. 1996. Development of a method based on alkaline gel  
626           electrophoresis for estimation of oxidative damage to DNA in *Escherichia coli*. *J Appl*  
627           Bacteriol 81:133-8.

628

629

630 **FIGURES**

631 Figures 1-6 are show below.

632

633

634

635

636

637

638

639

640

641

642

643

644

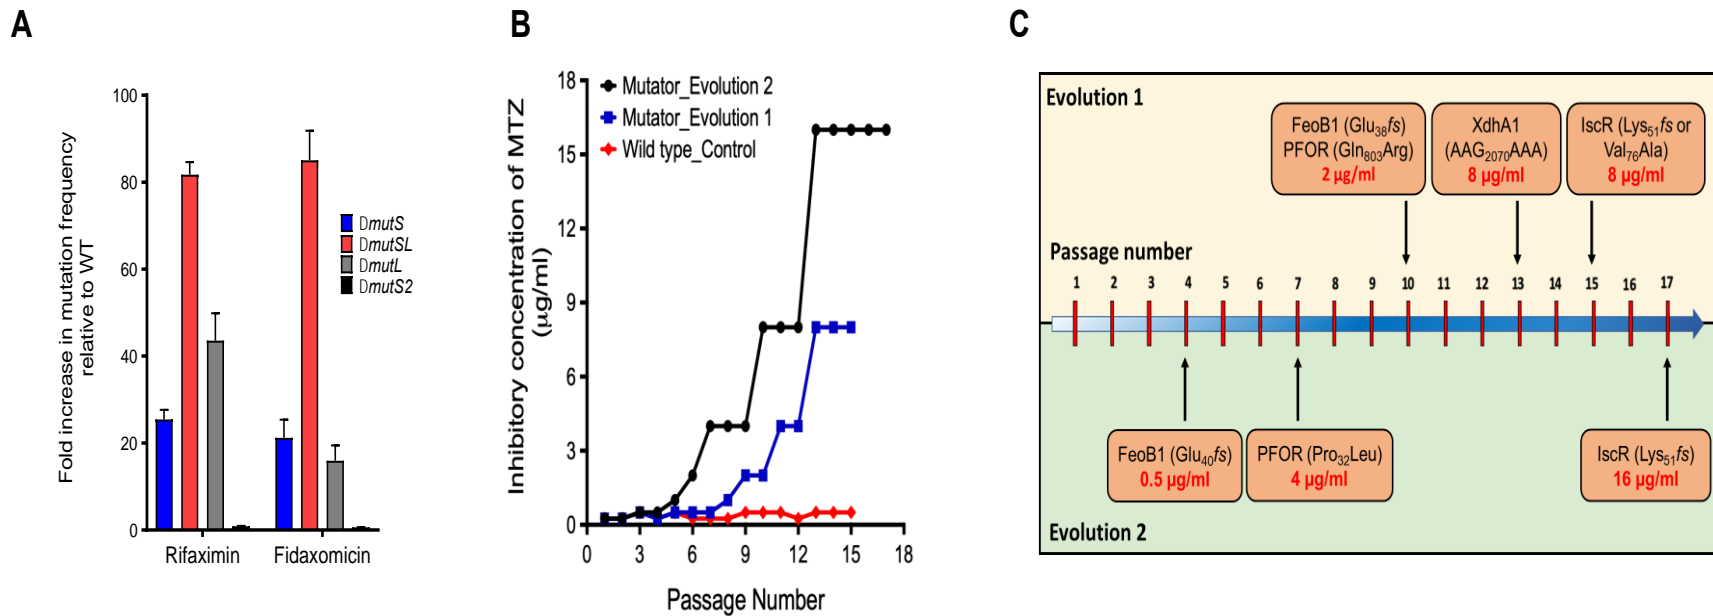

645

646 **Figure 1.** Evolution of metronidazole (MTZ) resistance using mismatch repair (MMR) deficient mutator. (A) Rifaximin and  
 647 fidaxomicin mutation frequencies (MFs) of strains with deletions in MMR genes; fold change in MFs are relative to WT  
 648 ATCC 700057. Plotted are means  $\pm$  SEM from three biological replicates. (B) Two independent experimental evolutions  
 649 with the mutator ( $\Delta$ *mutSL*) resulted in MTZ-resistant mutants, in contrast to the WT. (C) The order in which mutation were  
 650 accumulated in the two evolutions suggest there was a deterministic path to resistance.

651

652

653

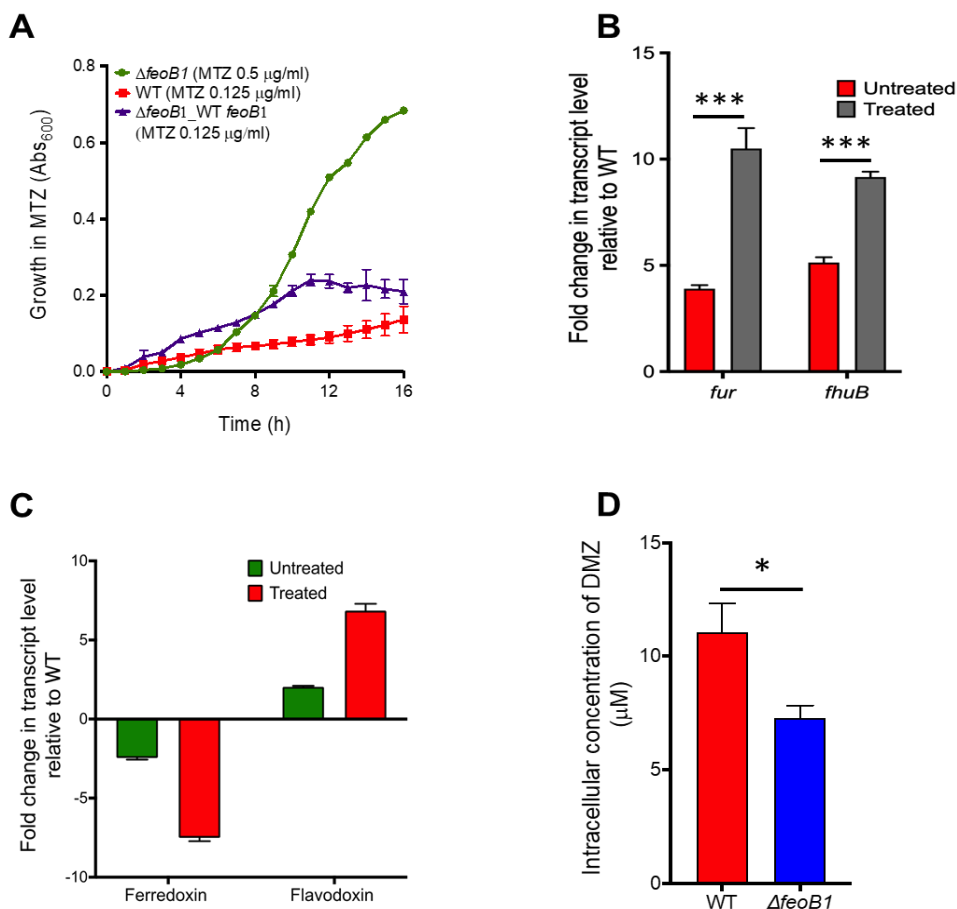

654

655 **Figure 2.** Effect of *feoB1* deletion on: (A) growth in metronidazole (MTZ). The  $\Delta feoB1$   
656 mutant grew better in MTZ, as shown from optical density readings [Abs<sub>600nm</sub>]. MICs  
657 were 1  $\mu\text{g/ml}$  against the  $\Delta feoB1$  mutant and MIC=0.25  $\mu\text{g/ml}$  against the WT and  
658 complemented  $\Delta feoB1$  strains. (B, C) Transcription of iron-response genes with respect  
659 to WT strain, in the absence and presence of MTZ at 4 x MIC against each strain.  
660 Increased expression of *fur* and *fhuB* without drug supports iron limitation in  $\Delta feoB1$   
661 mutant, while expression of flavodoxin over ferredoxin suggests a switch to flavodoxin-  
662 mediated metabolism. (D) Intracellular concentration of dimetridazole (DMZ), after 1  
663 hour, in the  $\Delta feoB1$  and WT strains, suggests less drug accumulation in the mutant.

664

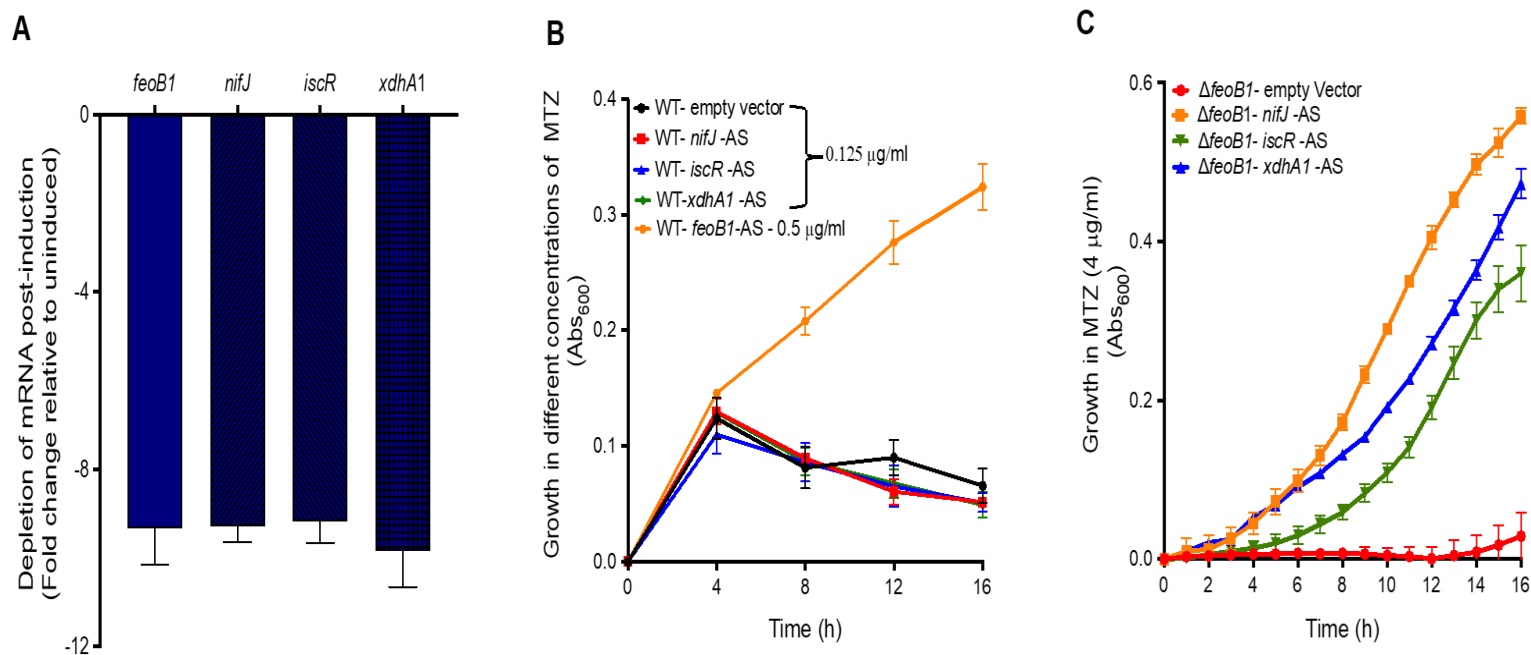

665

666

667 **Figure 3.** Effect of silencing *nifJ*, *iscR* or *xdhA1* on resistance in the  $\Delta feoB1$  mutant and WT strain. (A) In WT strain  
 668 depletion of mRNA for *feoB1*, *nifJ*, *iscR* and *xdhA1* occur when antisenses are induced with xylose (2% w/v); but (B)  
 669 resistance to metronidazole is seen with only depletion of *feoB1* (MIC=1  $\mu\text{g/ml}$ ). (C) Conversely, in the  $\Delta feoB1$  mutant,  
 670 expression of either of the three antisenses caused resistance (i.e. MICs of 8  $\mu\text{g/ml}$  versus 1  $\mu\text{g/ml}$  against  $\Delta feoB1$   
 671 mutant).

672



673

674

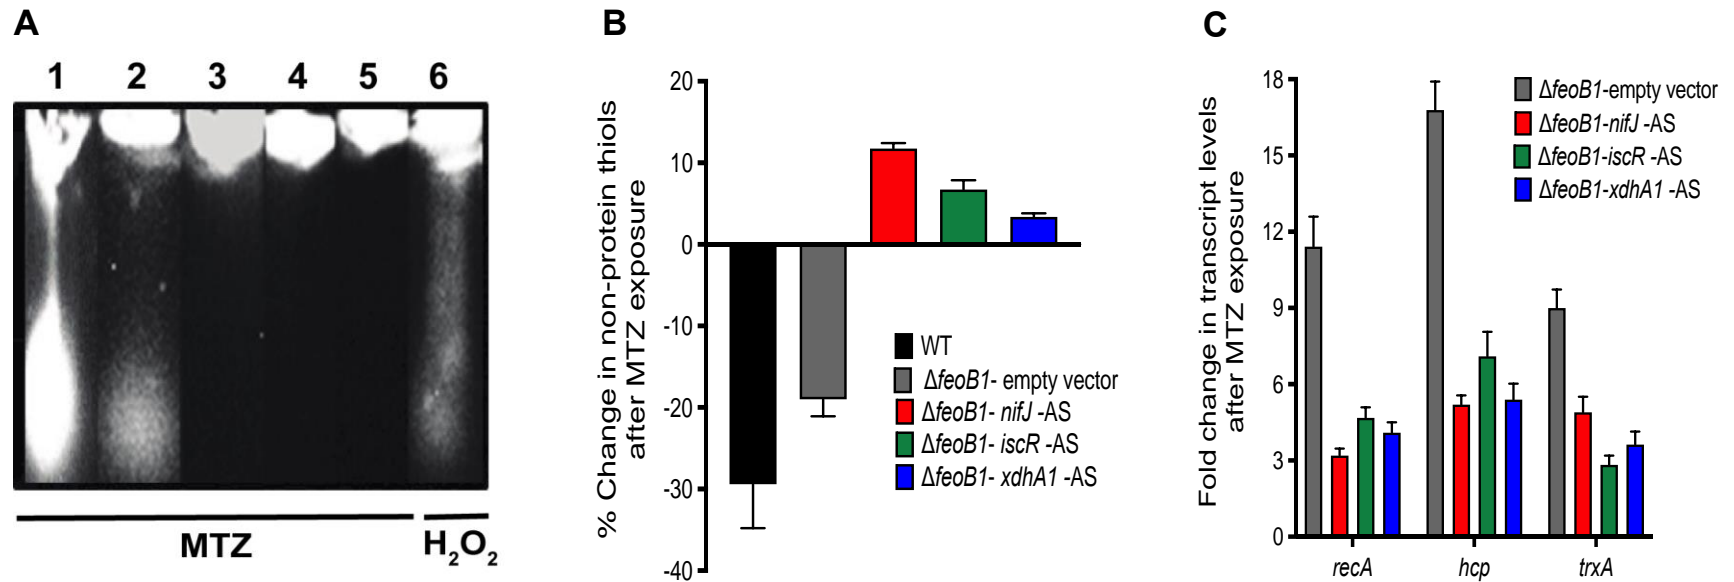

675

676 **Figure 4.** Biochemical and transcriptional validation that higher-level resistance (MIC=8  $\mu$ g/ml) occurs when mRNA for  
677 *nifJ*, *iscR* or *xdhA1* is depleted in the  $\Delta feoB1$  mutant. **(A)** Metronidazole (MTZ) induced DNA damage was attenuated in  
678 the  $\Delta feoB1$  mutant following expression of above antisenses, when compared to  $\Delta feoB1$  and WT strains carrying empty  
679 vectors. As a positive control, the WT was exposed to hydrogen peroxide (0.5% v/v) to visualize DNA fragmentation. The  
680 image is representative of 3 biological replicates. Resistance was confirmed from there being **(B)** less depletion of non-

681 protein thiols, which form adducts with MTZ; and (C) reduced expression of *recA*, *hcp* and *trxA* that respond to MTZ  
682 activity.

683

684

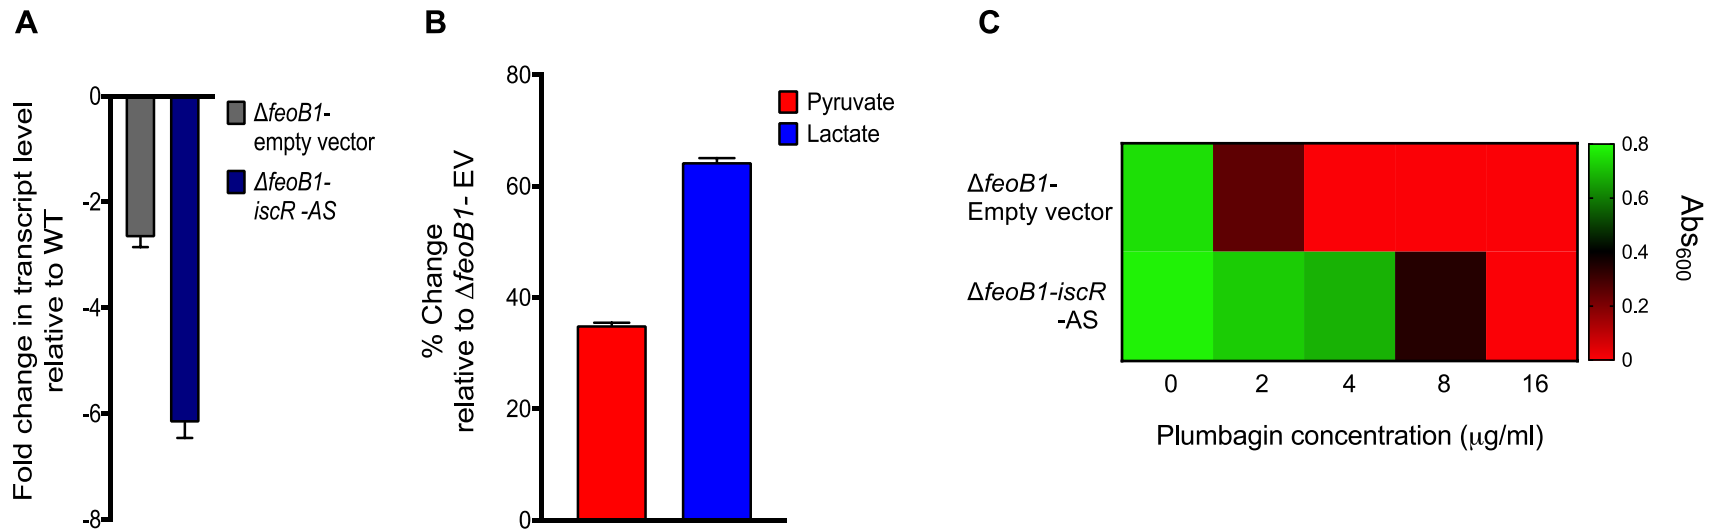

685

686

687 **Figure 5.** Analysis of how *iscR* inactivation promotes metronidazole (MTZ) resistance in the  $\Delta feoB1$  mutant. (A) Depletion  
688 of *iscR* mRNA in the  $\Delta feoB1$  mutant caused further downregulation of *nifJ*, which led to (B) accumulation of pyruvate and  
689 lactate (all values are relative to  $\Delta feoB1$ -empty vector). (C) Cross-resistance to plumbagin was seen; the heat-map shows  
690 that *iscR* depletion enhances growth in plumbagin (like MTZ, plumbagin is an electron acceptor). These results suggest

691 that loss of *iscR* globally affects iron-dependent electron transfer metabolic reactions, including pyruvate-ferredoxin  
692 oxidoreductase.

693

694

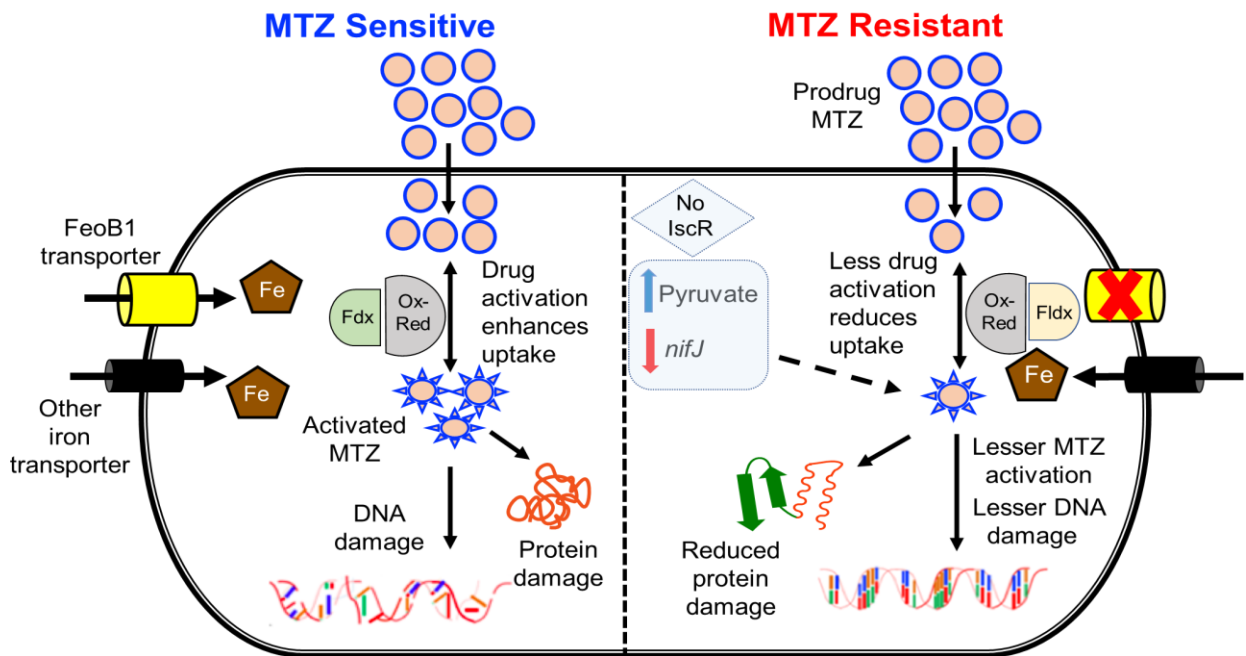

695

696 **Figure 6.** Proposed model of metronidazole (MTZ) resistance in *C. difficile*. (Left) In  
697 sensitive cells, MTZ is activated by oxidoreductases (Ox-Red; e.g. pyruvate-ferredoxin  
698 oxidoreductase [PFOR, *nifJ*]), resulting in free radical damage to DNA and protein  
699 damage. Activation then influences drug uptake. Susceptibility is influenced by iron  
700 uptake via transporters, mainly FeoB1 (the main iron transporter); and electron carrier  
701 proteins ferredoxin (Fdx) with low redox potential. (Right) In MTZ-resistant cells, loss of  
702 FeoB1 decreases intracellular iron content, probably shifting cells from ferredoxin (Fdx)  
703 to flavodoxin (Fldx) mediated metabolism. Fldx is less effective in activating MTZ. Loss  
704 of *iscR* synergizes with defective *feoB1* to further reduce metabolic activities that  
705 activates MTZ.
